# Supplementary material for: Investigation of CTNNB1 gene mutations and expression in hepatocellular carcinoma and cirrhosis in association with hepatitis B virus infection
Source: PubMed Central journal article supplement (PMC7268324; doi:10.1186/s13027-020-00297-5), 2020-06-03
Supplement: 13027_2020_297_MOESM1_ESM.pdf [file 13027_2020_297_MOESM1_ESM.pdf]

## Supplementary material

<https://doi.org/10.1186/s13027-020-00297-5>

### **Investigation of *CTNNB1* gene mutations and expression in hepatocellular carcinoma and cirrhosis in association with hepatitis B virus infection**

Davod Javanmard, Mohammad Najafi, Mohammad Reza Babaei, Mohammad Hadi Karbalaie Niya, Maryam Esghaei, Mahshid Panahi, Fahimeh Safarnezhad Tameshkel, Ahmad Tavakoli, Seyed Mohammad Jazayeri, Hadi Ghaffari, Angila Ataei-Pirkooh, Seyed Hamidreaz Monavari<sup>\*</sup>, Farah Bokharaei-Salim<sup>\*</sup>

#### **Contents:**

- 1- RNA extraction from FFPE samples
- 2- Figure 1
- 3- Figure 2
- 4- Figure 3
- 5- Table 1
- 6- References

## 1- RNA extraction from FFPE samples

**Background:** Tissue autolysis is one of most significant element affecting the integrity of isolated RNA from FFPE samples, by the effect of nucleases that occurs between the times of sampling to fixation. Additionally, it was shown that thickness of the specimens has direct association with increasing the nucleases effect due to reduced rate of formalin penetration and inactivation of enzymatic activity in more thick sections [1]. In this term, since most of liver biopsies are taken through needle biopsy and the sections are fine thin, the obtained RNA yield from liver FFPE samples is more reliable for gene expression profiling [2, 3]. Moreover, formaldehyde is responsible for cross linking of RNA to another proteins or nucleic acids, which reduces the yield of isolated RNA. In this regard, we tried to reverse the effects of formalin, at least in some, by buffer treatment and washing as indicated previously [4, 5]. Extensive heating can be used for removal of formalin adduct from the nucleic acids, but this method cause extensive degradation of RNA due to overheating [6]. So, we tried to optimize RNA extraction and subsequent RT-PCR assays by the benefit of PBS treatment-washing, as well as using proteinase K and soft grinding the tissue before extraction of RNA. Moreover, the poly-A tail of RNA are most potent component to degrade upon FFPE processing, so cDNA synthesis by random hexamer primers have shown to improve the quality of mRNA expression profiling from the FFPE samples [7], as we performed in this research.

**Protocol:** For each FFPE sample, 10 cuts with 10  $\mu\text{m}$  thickness were subjected to paraffin removal and additional processing before using the kit. The cuts were put in a 1.5  $\mu\text{L}$  tube, then 1 mL xylene was added. The tube was vortexed vigorously and incubated at 50° C for 1 hour. Thereafter tubes were centrifuged at 13000<sup>rpm</sup> for 3 min. The supernatant was removed with care and the step was repeated by adding 1 mL xylene. The pellet was washed with 100% ethanol 3 times, and finally air-dried. Dried tissues were immersed in PBS buffer and incubated at 4° C with occasional vortex. After 1-2 hours, the tubes were centrifuged at 13000<sup>rpm</sup> for 1 min and the PBS was replaced; this process was repeated between 3-5 times. The tubes were centrifuged again and after removal of the PBS, the pellet was partially dried. Then the samples were subjected to tissue RNA extraction kit (NucleoSpin® total RNA, MN, Macherey-Nagel GmbH & Co. KG).

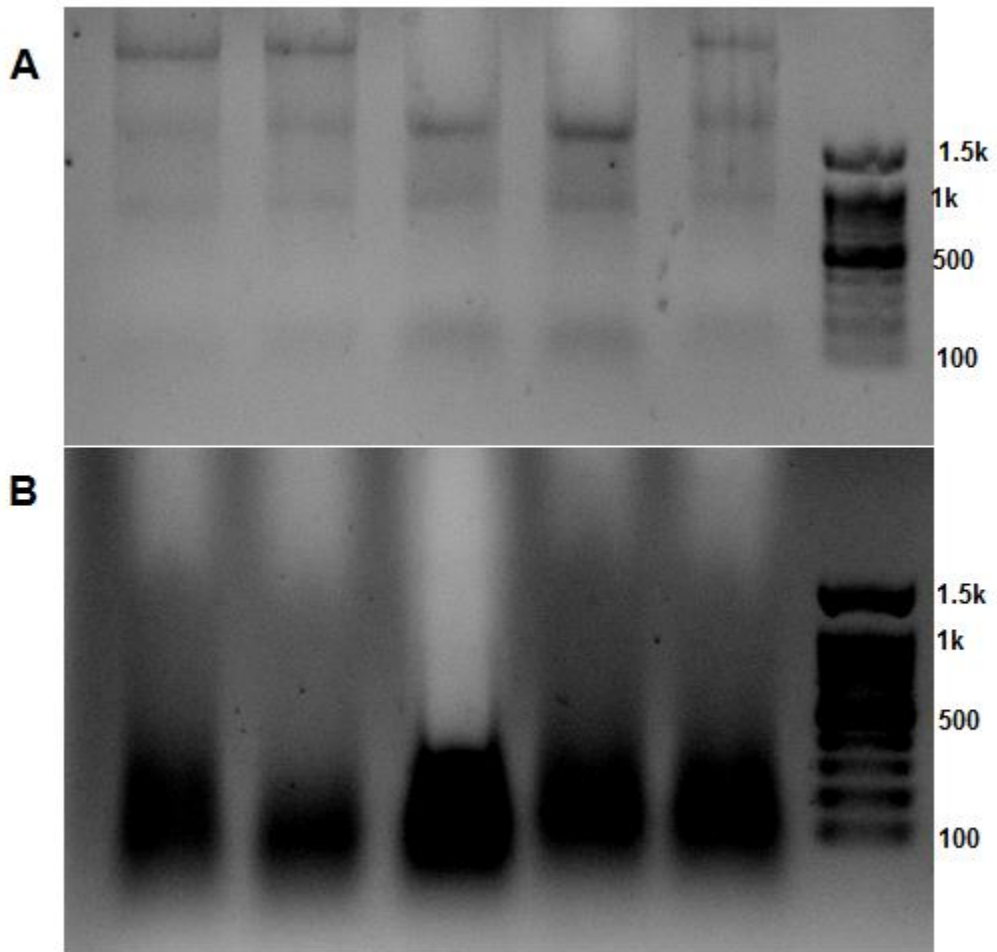

2- S. Figure 1. Ten  $\mu\text{L}$  of extracted RNA was run on 1% agarose gel with TBE buffer. A: FF-RNA, and B: FFPE-RNA

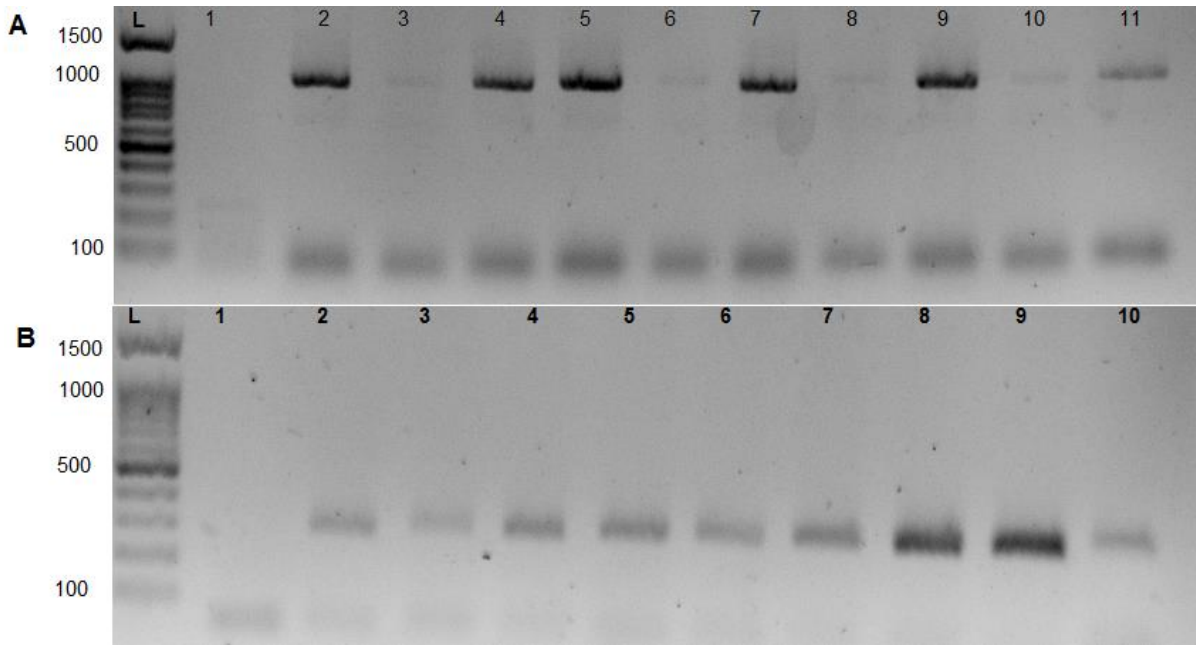

3- Figure 2. PCR products of  $\beta$ -catenin exon 3-5 (A) and exon 3 (B) were run on agarose gel. L: ladder, Lane 1: negative control, Lane 2: positive control, and the rest are samples.

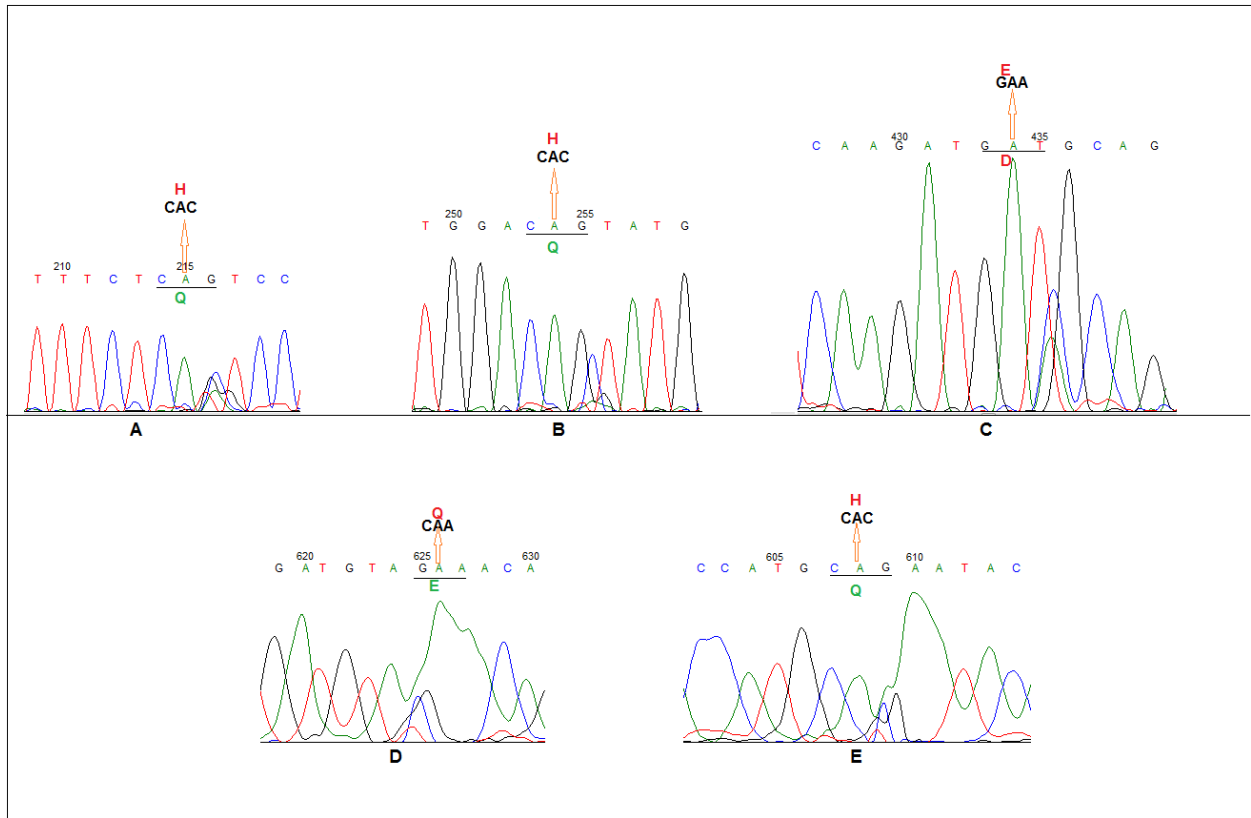

4- Figure 3. Unknown point mutations observed in exons 3-5 in the  $\beta$ -catenin among HCC samples. **A:** Q72H is in the exon 3, **B:** Q85H and **C:** D145E are within exon 4, **D:** E209Q and **E:** Q203H are in the exon 5. Green letters below the codon specify the wild type amino acid, red one above the mutant code represents the mutated amino acid. The number ordering of nucleotides begin from the start codon of  $\beta$ -catenin gene (NG\_013302).

| 5- Table 1. list of mutations observed in this study |        |                 |                         |        |                                           |
|------------------------------------------------------|--------|-----------------|-------------------------|--------|-------------------------------------------|
| Sample code                                          | Codon  | Wild type codon | Mutant codon            | Exon   | Function                                  |
| P31hc                                                | 43     | GCT             | GCC                     | 3      | Nonsense                                  |
| P18hc                                                | 29     | TCT             | TCC                     | 3      | Nonsense                                  |
| 39f.hp                                               | 48     | GGT             | GGG                     | 3      | Nonsense                                  |
| P181h                                                | D32G/V | GAC             | GGC/GTC                 | 3      | interaction of $\beta$ -catenin with Fbw1 |
| P98h                                                 | S33C   | TCT             | TGT                     | 3      | phosphorylation sites for GSK-3 $\beta$   |
| 125f                                                 | H36G   | CAT             | CAG                     | 3      | hot-spot                                  |
| 212f                                                 | S37C   | TCT             | TGT                     | 3      | phosphorylation sites for GSK-3 $\beta$   |
| 83f.bh                                               | G38V   | GGT             | GTT                     | 3      | hot-spot                                  |
| P8.hc                                                | G38S/R | GGT             | AGT/CGT                 | 3      | hot-spot                                  |
| F45.p1                                               | A39V   | GCC             | GTC                     | 3      | hot-spot                                  |
| P158                                                 | T41I   | ACC             | ATC                     | 3      | phosphorylation sites for GSK-3 $\beta$   |
| P66.h                                                | T42A   | ACA             | GCA                     | 3      | hot-spot                                  |
| P204.h                                               | P44R   | CCT             | CGT                     | 3      | hot-spot                                  |
| Pf32                                                 | S45P   | TCT             | CCT                     | 3      | phosphorylation site for casein kinase-1  |
| Pf128                                                | Q72H   | CAG             | CAC                     | 3      | New mutation                              |
| F1.hp                                                |        | GGTGAAGAAA      | GGTGAA <del>A</del> AAA | Intron | New mutation                              |
| F25.hp                                               | Q85H   | CAG             | CAC                     | 4      | New mutation                              |
| P51f                                                 | D145E  | GAT             | GAA                     | 4      | New mutation                              |
| Pf43H                                                |        | GGAGTAGTT       | GGACTAGTT               | Intron | New mutation                              |

|     |       |     |     |   |              |
|-----|-------|-----|-----|---|--------------|
| F21 | Q203H | CAG | CAC | 5 | New mutation |
| F15 | E209Q | GAA | CAA | 5 | New mutation |

## 6- References

1. Von Ahlfen, S., et al., *Determinants of RNA quality from FFPE samples*. PloS one, 2007. **2**(12): p. e1261.
2. Rong, M., G. Chen, and Y. Dang, *Increased miR-221 expression in hepatocellular carcinoma tissues and its role in enhancing cell growth and inhibiting apoptosis in vitro*. BMC cancer, 2013. **13**(1): p. 21.
3. Pan, L., et al., *Decreased expression and clinical significance of miR-148a in hepatocellular carcinoma tissues*. European Journal of Medical Research, 2014. **19**(1): p. 68.
4. Evers, D.L., et al., *The effect of formaldehyde fixation on RNA: optimization of formaldehyde adduct removal*. The Journal of molecular diagnostics : JMD, 2011. **13**(3): p. 282-288.
5. Joshi, B.D., et al., *An effective method for extraction and polymerase chain reaction (PCR) amplification of DNA from formalin preserved tissue samples of snow leopard*. African Journal of Biotechnology, 2013. **12**(22).
6. Karmakar, S., et al., *Organocatalytic removal of formaldehyde adducts from RNA and DNA bases*. Nature chemistry, 2015. **7**(9): p. 752-758.
7. Mittempergher, L., et al., *Gene expression profiles from formalin fixed paraffin embedded breast cancer tissue are largely comparable to fresh frozen matched tissue*. PloS one, 2011. **6**(2): p. e17163.
